# Supplementary material for: Electrocatalytic reduction of PhCH2Cl on Ag-ZSM-5 zeolite modified electrode
Source: Royal Society of Chemistry journal article supplement (doi:10.1039/c6ra09141e), 2016-01-01
Supplement: c6ra09141e1.pdf [file c6ra09141e1.pdf]

## Supporting Information

### Electrocatalytic reduction of PhCH<sub>2</sub>Cl on Ag-ZSM-5 zeolite modified electrode

Guo-Jiao Sui, Qi-Long Sun, Di Wu, Wang-Jun Meng, Huan Wang\*, Jia-Xing Lu\*

*Shanghai Key Laboratory of Green Chemistry and Chemical Processes, School of Chemistry and Molecular Engineering, East China Normal University, Shanghai 200062, China*

#### 1. Materials and Instruments

All reagents were used as received, except for acetonitrile which was dried over 4Å molecular sieves.

XRD patterns were collected at 35 kV and 25 mA using a Rigaku Ultima IV diffractometer with Cu K $\alpha$  radiation.

SEM measurements were achieved on a Hitachi S-4800 instrument.

TEM analyses were carried on a FEI TECNAI G2 F30 operating at 300 KV.

The amounts of Si, Al, Na and Ag etc. in zeolites were quantified by ICP on a Thermo IRIS Intrepid II XSP atomic emission spectrometer.

Nitrogen adsorption–desorption isotherms at 77K were obtained on a BELSORP-max equipment. Specific surface areas were calculated according to the BET-method using five relative pressure points in the interval of 0.01 - 0.1, and the external surface and the micropore volume of the samples were calculated using the *t*-plot method.

XPS was measured using a Thermo Fisher Scientific ESCALAB 250 spectrometer with Al K $\alpha$  radiation (1486.6 eV) as incident beam with a monochromator.

H<sub>2</sub>-TPR analysis was carried out with the Quantachrome Chem 3000 apparatus.

The conductivity was determined by Four-Point Probes RST-8.

All electrochemical experiments were performed on a CHI 660D electrochemical work station (Chenhua, Shanghai, China) in an undivided cell.

Electrocarboxylation yield was quantitative analyzed by Gas Chromatography (Shimadzu, GC-2014).

## **2. General procedure**

### **2.1. General procedure for preparation of Ag-ZSM-5 zeolite modified electrode (Ag-ZSM-5/SS ZME)**

The stainless steel substrates (SS-304) were polished by abrasive paper (400 grit), then cleaned with distilled water and acetone in an ultrasonic cleaner. The Ag-ZSM-5/SS zeolite modified electrodes were synthesized by a one-step process in a solution with a molar composition of Al:NaOH:TPAOH:TEOS:AgNO<sub>3</sub>:H<sub>2</sub>O = 0.0018:0.64:0.16:1.0:0.078:92.0. The clear solution was aged at room temperature for 4 h under stirring and then transferred to a 100 mL Teflon-lined Parr autoclave. The stainless steel substrates were fixed inside the synthesis solution. Crystallization was carried out in a convection oven at 175 °C for 16 h. The samples were then removed from the autoclave and cooled.

### **2.2. Electrochemical measurements of Ag-ZSM-5/SS**

Cyclic voltammetry were carried out using a traditional three-electrode system with a Ag, or Ag-ZSM-5/SS as working electrode, a Pt wire as counter electrode and a Ag/AgI/I<sup>-</sup> as reference electrode, in 2.6 mM PhCH<sub>2</sub>Cl – 0.1 M TEAP – MeCN solution.

Potentiostatic electrolysis were carried out with a Ag or Ag-ZSM-5/SS as working electrode, a Mg rod as sacrificial anode and a Ag/AgI/I<sup>-</sup> as reference electrode, in 0.05 M PhCH<sub>2</sub>Cl – 0.1 M TEAP – MeCN solution in the presence of CO<sub>2</sub>. After the electrolysis, the electrolyte was esterified by addition of anhydrous K<sub>2</sub>CO<sub>3</sub> and methyl iodide at 50-60°C for 5 h. The solution was treated with aq HCl and extracted by diethyl ether. The organic layers were washed with H<sub>2</sub>O, dried over MgSO<sub>4</sub>, and evaporated before quantitatively analyzed by GC.

The electrochemically active surface areas (ECSA,  $\text{cm}^2$ ) of Ag-ZSM-5/SS were measured by analyzing the charge associated with Pd under potential deposition stripping, associated with theoretical value of  $400 \mu\text{C}/\text{cm}^2$  for full coverage of Pb on Ag.[1]

### 3. Characterization of Ag-ZSM-5/SS

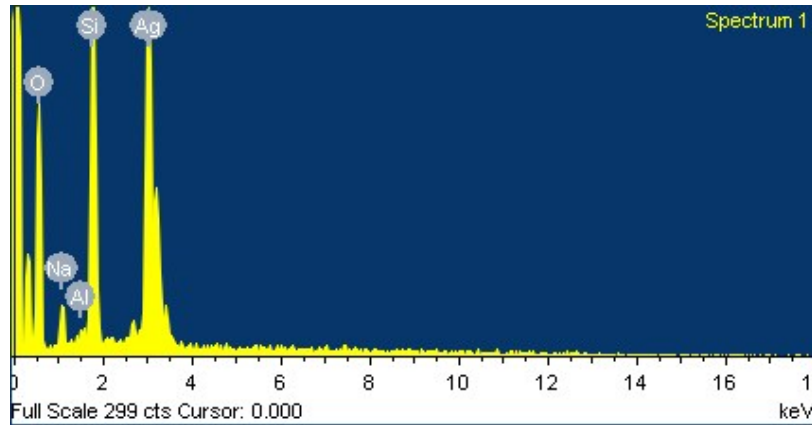

| Element | Weight (%) | Atomic (%) |
|---------|------------|------------|
| O K     | 49.51      | 76.52      |
| Na K    | 2.81       | 3.02       |
| Al K    | 0.09       | 0.08       |
| Si K    | 14.53      | 12.80      |
| Ag L    | 33.07      | 7.58       |
| Totals  | 100.00     |            |

**Fig. S1** The EDX spectrum of Ag-ZSM-5

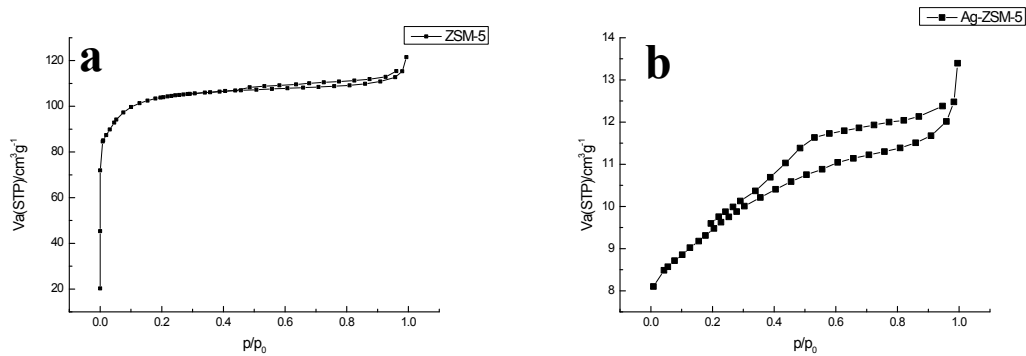

**Fig. S2**  $\text{N}_2$  adsorption–desorption isotherms for ZSM-5 (a) and Ag-ZSM-5(b)

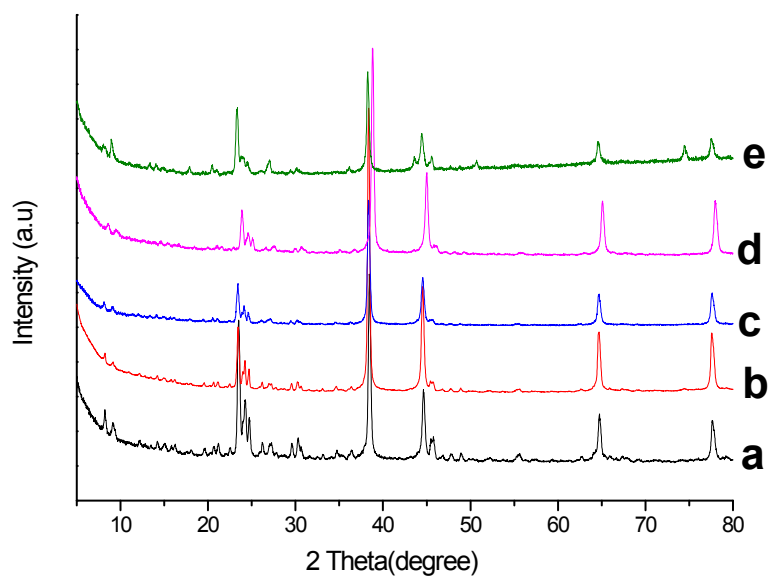

**Fig. S3** XRD patterns of Ag-ZSM-5/SS electrodes prepared under different  $\text{AgNO}_3$  concentration. a. Ag-ZSM-5/SS (0.0125 M), b. Ag-ZSM-5/SS (0.025 M), c. Ag-ZSM-5/SS (0.05 M), d. Ag-ZSM-5/SS (0.075 M), e. Ag-ZSM-5/SS (0.1 M).

#### 4. Characterization of used Ag-ZSM-5/SS

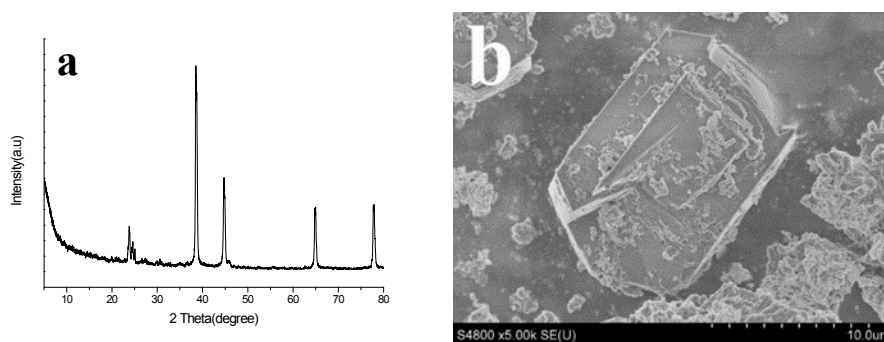

**Fig. S4.** XRD pattern (a) and SEM image (b) of Ag-ZSM-5/SS after bulk electrolysis.

#### Reference

1. E. Kirowa-Eisner, D. Tzur and E. Gileadi, *J. Electroanal. Chem.*, 2008, **621**, 146-158.
